# Supplementary material for: Luminescent Cu4I4-cubane clusters based on N-methyl-5,10-dihydrophenarsazines
Source: Royal Society of Chemistry journal article supplement (doi:10.1039/d1dt02344f), 2021-01-01
Supplement: d1dt02344f1.pdf [file d1dt02344f1.pdf]

## SUPPORTING INFORMATION

### Luminescent Cu<sub>4</sub>I<sub>4</sub>-cubane clusters based on *N*-methyl-5,10-dihydrophenarsazines

Milyausha F. Galimova,<sup>[a]</sup> Ekaterina M. Zueva,<sup>[b]</sup> Alexey B. Dobrynin,<sup>[a]</sup> Ilya E. Kolesnikov,<sup>[c]</sup>  
Rustem R. Musin,<sup>[b]</sup> Elvira I. Musina,<sup>[a]</sup> Andrey A. Karasik<sup>[a]</sup>

<sup>a</sup> Arbuzov Institute of Organic and Physical Chemistry, FRC Kazan Scientific Center, Russian Academy of Sciences, 8 Arbuzov Street, Kazan 420088, Russian Federation

<sup>b</sup> Kazan National Research Technological University, 68 Karl Marx Street, Kazan 420015, Russian Federation

<sup>c</sup> Center for Optical and Laser Materials Research, Saint Petersburg State University, 5 Ulianovskaya Street, Saint Petersburg 198504, Russian Federation

#### Table of contents

|                                                                                             |    |
|---------------------------------------------------------------------------------------------|----|
| I. <sup>1</sup> H NMR spectra of ligands and complexes (Figures S1, S2).....                | S2 |
| II. Single-crystal and powder X-ray diffraction data (Tables S1, S2 and Figures S3–S6)..... | S3 |
| III. Photophysical properties (Figures S7–S14, Table S3).....                               | S7 |

## I. $^1\text{H}$ NMR spectra of ligands and complexes

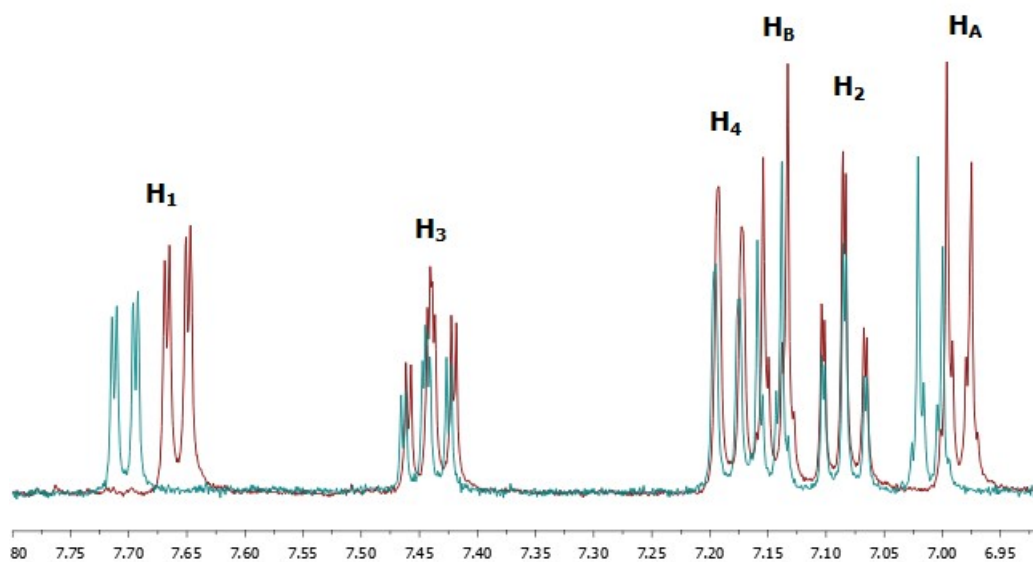

**Figure S1.** Comparison of  $^1\text{H}$  NMR spectra for ligand **1** (red line) and complex **3** (green line), measured in  $\text{CD}_3\text{CN}$  (the range from 6.90 to 7.80 ppm is shown).

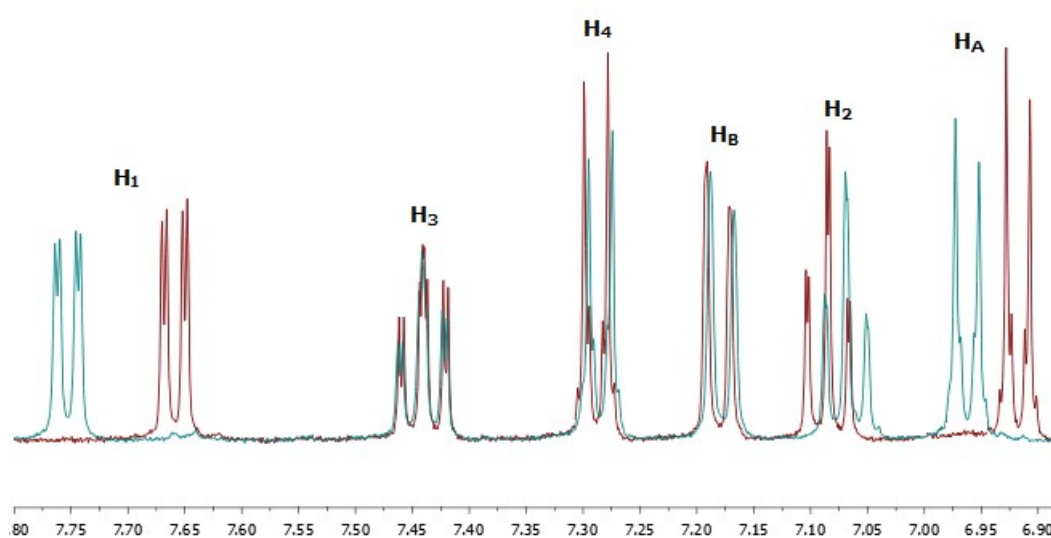

**Figure S2.** Comparison of  $^1\text{H}$  NMR spectra for ligand **2** (red line) and complex **4** (green line), measured in  $\text{CD}_3\text{CN}$  (the range from 6.90 to 7.80 ppm is shown).

## II. Single crystal and powder X-ray diffraction data

**Table S1.** Selected interatomic distances (in Å) in **3** and **4**.

|       | Complexes        |                  |
|-------|------------------|------------------|
|       | <b>3</b>         | <b>4</b>         |
| Cu-Cu | Cu1-Cu1 2.678(1) | Cu1-Cu1 2.629(1) |
|       | Cu1-Cu1 2.806(2) | Cu1-Cu1 2.743(2) |
| Cu-I  | Cu1-Cu1 2.687(1) | Cu1-Cu1 2.629(1) |
|       | Cu1-I1 2.652(1)  | Cu1-I1 2.652(1)  |
|       | Cu1-I1 2.688(1)  | Cu1-I1 2.680(1)  |
|       | Cu1-I1 2.716(1)  | Cu1-I1 2.705(1)  |
|       | Cu1-I1 2.652(1)  | Cu1-I1 2.652(1)  |
|       | Cu1-I1 2.688(1)  | Cu1-I1 2.680(1)  |
|       | Cu1-I1 2.716(1)  | Cu1-I1 2.705(1)  |
|       | Cu1-I1 2.652(1)  | Cu1-I1 2.652(1)  |
|       | Cu1-I1 2.688(1)  | Cu1-I1 2.680(1)  |
|       | Cu1-I1 2.716(1)  | Cu1-I1 2.705(1)  |
|       | Cu1-I1 2.652(1)  | Cu1-I1 2.652(1)  |
| Cu-As | Cu1-As1 2.362(1) | Cu1-As1 2.353(1) |
|       | Cu1-As1 2.362(1) | Cu1-As1 2.353(1) |

**Table S2.** Selected structural parameters (distances in Å, angles in °) for **3** and **4**.

|                                            | Complexes |          |
|--------------------------------------------|-----------|----------|
|                                            | <b>3</b>  | <b>4</b> |
| As1... <i>P</i> (C1C6C7C12)                | 0.636     | 0.629    |
| N1... <i>P</i> (C1C6C7C12)                 | 0.388     | 0.378    |
| As1...C13                                  | 1.959     | 1.946    |
| ∠C13-As1-C1                                | 97.74     | 97.39    |
| ∠C13-As1-C12                               | 100.64    | 100.40   |
| ∠C1-As1-C12                                | 94.88     | 95.74    |
| ∠C6-N1-C7                                  | 121.12    | 122.21   |
| ∠ <i>P</i> (C1-C6)- <i>P</i> (C7-C12)      | 37.75     | 35.24    |
| ∠ <i>P</i> (C1C6C7C12)- <i>P</i> (C13-C18) | 76.79     | 76.93    |
| ∠N1-As1-C13-C14(C18)                       | 72.79     | 71.97    |

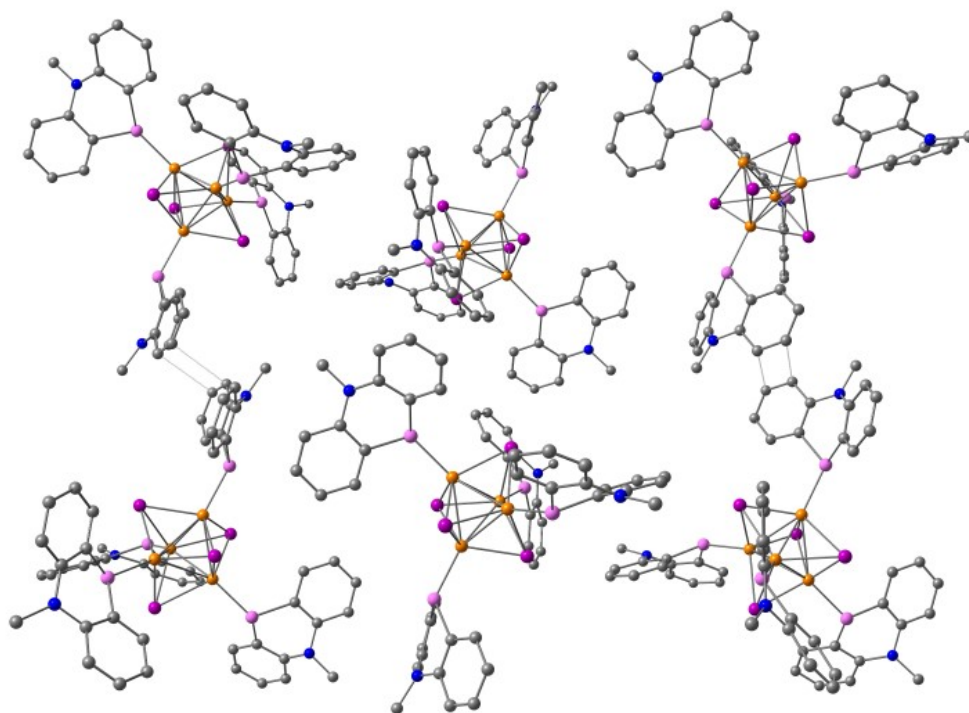

**Figure S3.** Fragment of packing of **3** in the crystal. The aryl substituent at the arsenic atom is not shown for clarity. Similar packing is observed for **4**.

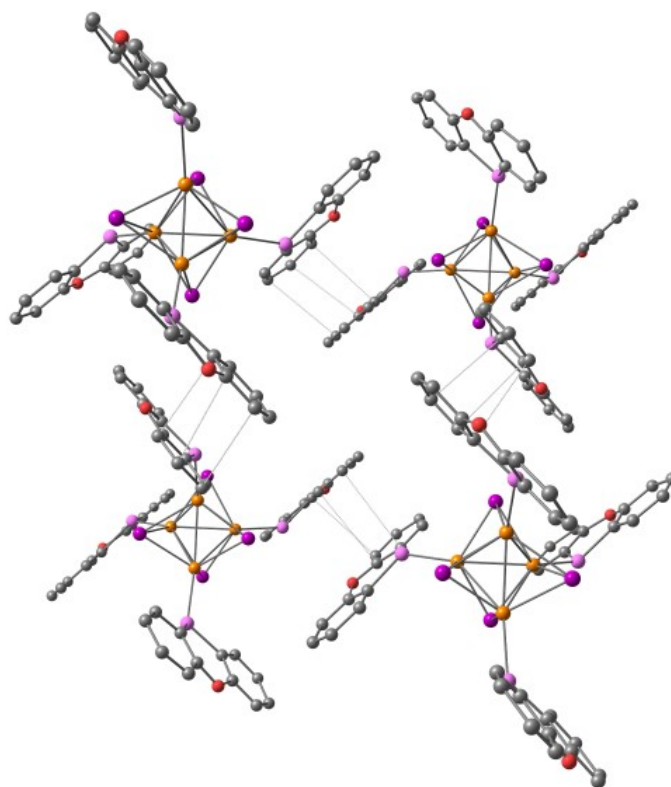

**Figure S4.** Fragment of packing of compound  $[\text{Cu}_4\text{I}_4(10\text{-}p\text{-fluorophenyl)phenoxarsine}]_4$  in the crystal. The aryl substituent at the arsenic atom is not shown for clarity.

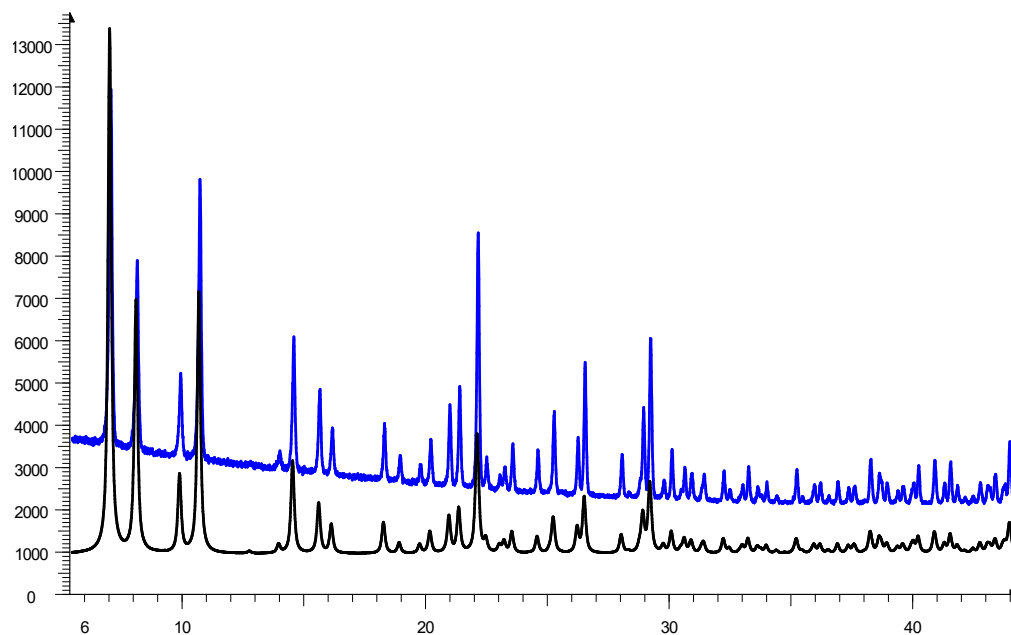

**Figure S5.** Theoretical powder diffractogram (black line) calculated from the single-crystal X-ray data for **3** and experimental powder diffractogram (blue line) of the dried polycrystalline powder sample.

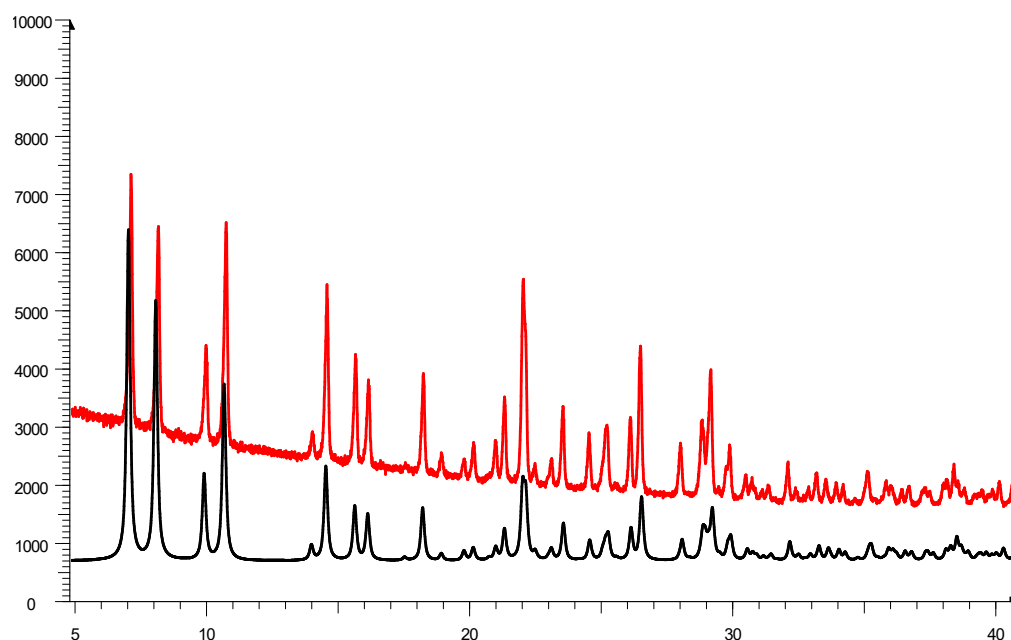

**Figure S6.** Theoretical powder diffractogram (black line) calculated from the single-crystal X-ray data for **4** and experimental powder diffractogram (red line) of the dried polycrystalline powder sample.

### III. Photophysical properties

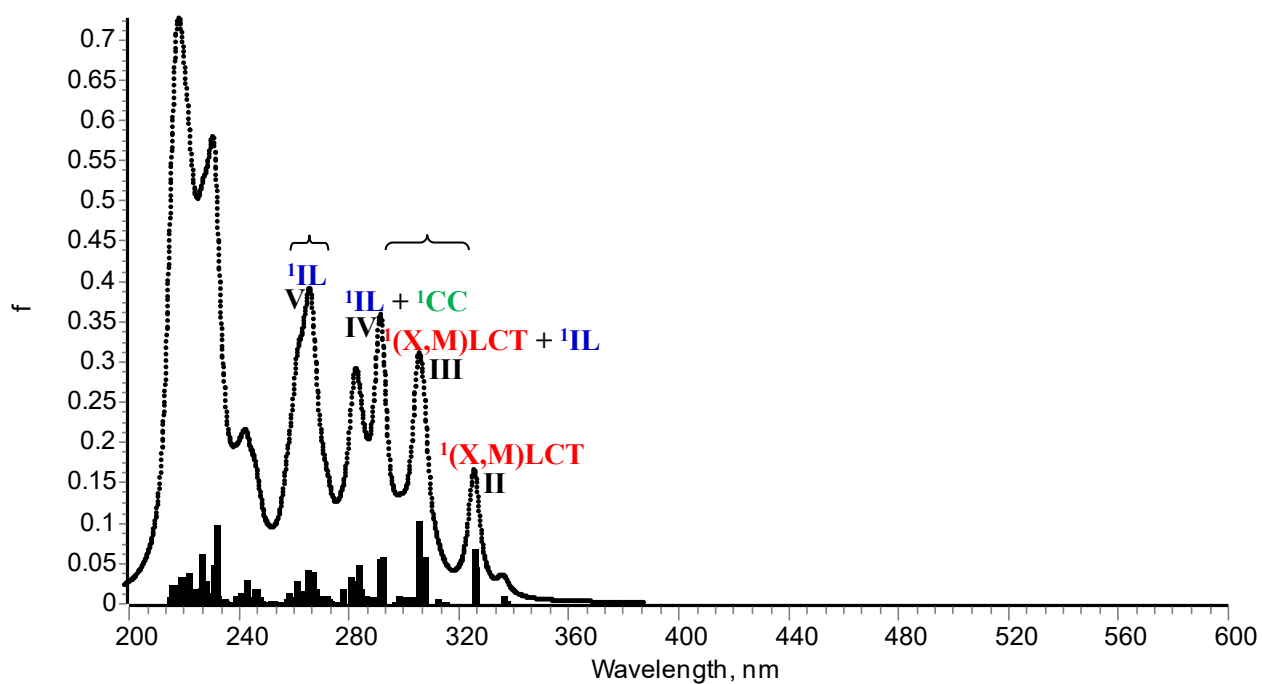

**Figure S7.** The calculated absorption spectrum for **3**. The vertical lines showing the position of singlet-singlet electronic transitions and their intensity ( $f$  – oscillator strength) were broadened by the Lorentz function (f.w.h.m. = 0.25 eV).

**Table S3.** The calculated excitation energies (absorption wavelengths), oscillator strengths, natural transition orbital (NTO) pairs and their eigenvalues (occupations) for selected excited states of **3**.

| subset: type                                    | $\lambda$ | $f$  | $N_e$ | occ. | NTO pair                                                                             |                                                                                       |
|-------------------------------------------------|-----------|------|-------|------|--------------------------------------------------------------------------------------|---------------------------------------------------------------------------------------|
| <b>I:</b><br>$^1\text{CC}$                      | 337       | 0.00 | 1     | 0.98 | 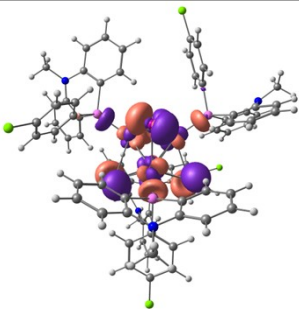   |    |
|                                                 |           |      |       |      | HOMO                                                                                 | LUMO+4                                                                                |
|                                                 | 336       | 0.01 | 2     | 0.98 |    |    |
|                                                 |           |      |       |      | HOMO-1                                                                               | LUMO+4                                                                                |
|                                                 | 336       | 0.01 | 3     | 0.98 |   |   |
|                                                 |           |      |       |      | HOMO-2                                                                               | LUMO+4                                                                                |
| <b>II:</b><br>$^1(\text{X},\text{M})\text{LCT}$ | 326       | 0.05 | 4     | 0.70 |  |  |
|                                                 |           |      |       |      |  |  |
|                                                 |           |      |       | 0.29 |                                                                                      |                                                                                       |



|                                                |     |      |    |      |                                                                                      |                                                                                       |
|------------------------------------------------|-----|------|----|------|--------------------------------------------------------------------------------------|---------------------------------------------------------------------------------------|
|                                                | 326 | 0.05 | 5  | 0.70 | 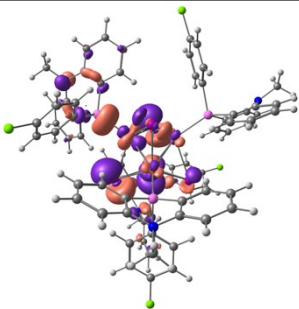   |    |
|                                                |     |      |    | 0.29 |    |    |
|                                                | 325 | 0.07 | 6  | 0.43 |   |   |
|                                                |     |      |    | 0.27 |  |  |
|                                                |     |      |    | 0.26 |  |  |
| <b>III:</b><br>${}^1(X,M)LCT$<br>+<br>${}^1IL$ | 307 | 0.06 | 21 | 0.44 |  |  |

|     |      |    |      |                                                                                      |                                                                                       |
|-----|------|----|------|--------------------------------------------------------------------------------------|---------------------------------------------------------------------------------------|
|     |      |    | 0.37 | 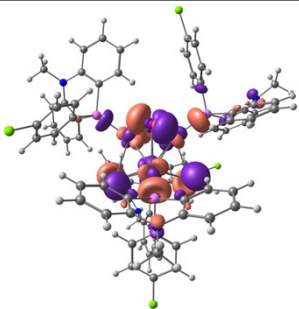   |    |
| 307 | 0.06 | 22 | 0.44 |    |    |
|     |      |    | 0.37 |   |   |
| 305 | 0.05 | 24 | 0.45 |  |  |
|     |      |    | 0.30 |  |  |
| 305 | 0.05 | 25 | 0.45 |  |  |

|                                                       |     |      |    |      |                                                                                      |                                                                                       |
|-------------------------------------------------------|-----|------|----|------|--------------------------------------------------------------------------------------|---------------------------------------------------------------------------------------|
|                                                       |     |      |    | 0.30 | 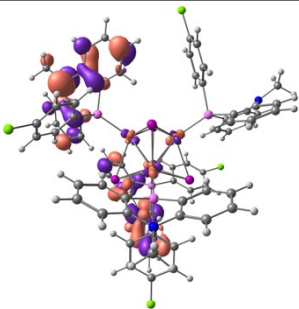   |    |
|                                                       | 305 | 0.10 | 27 | 0.24 |    |    |
|                                                       |     |      |    | 0.21 |   |   |
|                                                       |     |      |    | 0.20 |  |  |
|                                                       |     |      |    | 0.20 |  |  |
| <b>IV:</b><br><sup>1</sup> IL<br>+<br><sup>1</sup> CC | 292 | 0.06 | 51 | 0.55 |  |  |

|     |      |    |      |                                                                                      |                                                                                       |
|-----|------|----|------|--------------------------------------------------------------------------------------|---------------------------------------------------------------------------------------|
|     |      |    | 0.38 | 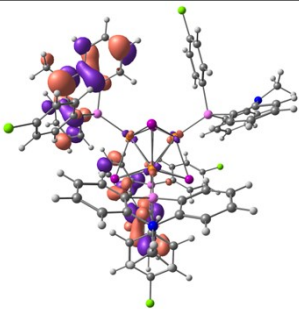   |    |
| 292 | 0.06 | 52 | 0.55 |    |    |
|     |      |    | 0.38 |   |   |
| 292 | 0.04 | 53 | 0.63 |  |  |
| 291 | 0.04 | 54 | 0.37 |  |  |
|     |      |    | 0.22 |  |  |

|     |      |    |  |      |                                                                                      |                                                                                       |
|-----|------|----|--|------|--------------------------------------------------------------------------------------|---------------------------------------------------------------------------------------|
|     |      |    |  | 0.20 | 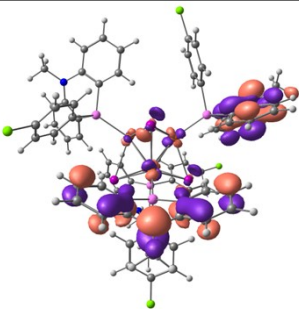   |    |
|     |      |    |  | 0.13 |    |    |
| 291 | 0.06 | 56 |  | 0.67 |   |   |
| 291 | 0.06 | 57 |  | 0.67 |  |  |
| 284 | 0.05 | 81 |  | 0.26 |  |  |
|     |      |    |  | 0.18 |  |  |

|                              |     |      |     |      |                                                                                      |                                                                                       |
|------------------------------|-----|------|-----|------|--------------------------------------------------------------------------------------|---------------------------------------------------------------------------------------|
|                              |     |      |     | 0.18 | 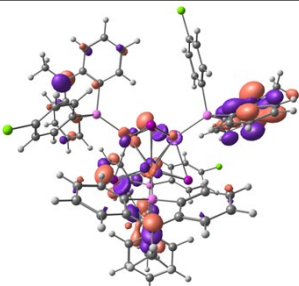   |    |
|                              |     |      |     | 0.16 |    |    |
| <b>V:</b><br><sup>1</sup> IL | 267 | 0.04 | 159 | 0.28 |   |   |
|                              |     |      |     | 0.26 |  |  |
|                              |     |      |     | 0.12 |  |  |
|                              |     |      |     | 0.10 |  |  |

|                                                                                            |     |      |     |      |                                                                                      |                                                                                       |
|--------------------------------------------------------------------------------------------|-----|------|-----|------|--------------------------------------------------------------------------------------|---------------------------------------------------------------------------------------|
|                                                                                            |     |      |     | 0.10 | 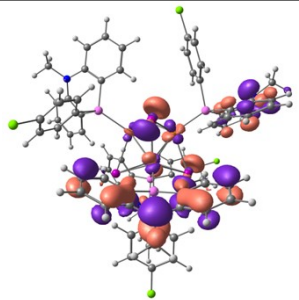   |    |
|                                                                                            | 265 | 0.04 | 171 | 0.29 |    |    |
|                                                                                            |     |      |     | 0.24 |   |   |
|                                                                                            |     |      |     | 0.24 |  |  |
| <b>VI:</b><br>${}^1\text{IL}$<br>+<br>${}^1(\text{X,M})\text{LCT}$<br>+<br>${}^1\text{CC}$ | 231 | 0.10 | 360 | 0.43 |  |  |
|                                                                                            |     |      |     | 0.24 |  |  |

|     |      |     |      |      |                                                                                      |                                                                                       |
|-----|------|-----|------|------|--------------------------------------------------------------------------------------|---------------------------------------------------------------------------------------|
|     |      |     |      | 0.12 | 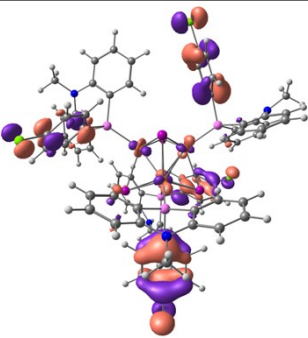   |    |
| 231 | 0.10 | 361 | 0.40 | 0.21 |    |    |
|     |      |     | 0.12 |      |   |   |
| 230 | 0.05 | 372 | 0.62 |      |  |  |



|  |     |      |     |      |                                                                                      |                                                                                       |
|--|-----|------|-----|------|--------------------------------------------------------------------------------------|---------------------------------------------------------------------------------------|
|  | 230 | 0.05 | 373 | 0.62 | 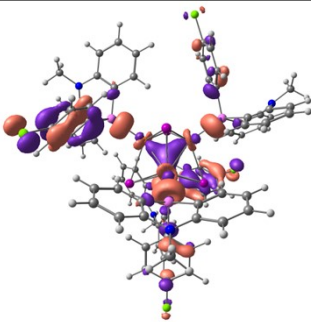   |    |
|  | 227 | 0.06 | 402 | 0.21 |    |    |
|  |     |      |     | 0.20 |   |   |
|  |     |      |     | 0.18 |  |  |
|  | 221 | 0.04 | 456 | 0.23 |  |  |
|  |     |      |     | 0.16 |  |  |

|     |      |     |      |                                                                                      |                                                                                       |                                                                                      |
|-----|------|-----|------|--------------------------------------------------------------------------------------|---------------------------------------------------------------------------------------|--------------------------------------------------------------------------------------|
|     |      |     |      | 0.13                                                                                 | 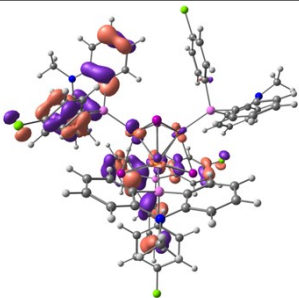    |   |
|     |      |     |      | 0.12                                                                                 |     |   |
|     |      |     |      | 0.10                                                                                 |    |  |
| 221 | 0.04 | 457 | 0.23 |  |  |                                                                                      |
|     |      |     | 0.16 |  |  |                                                                                      |
|     |      |     | 0.13 |  |  |                                                                                      |

|  |  |  |  |      |                                                                                    |                                                                                     |
|--|--|--|--|------|------------------------------------------------------------------------------------|-------------------------------------------------------------------------------------|
|  |  |  |  | 0.12 | 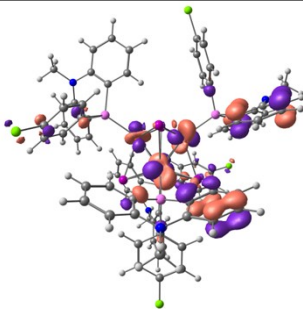 |  |
|  |  |  |  | 0.10 |  |  |

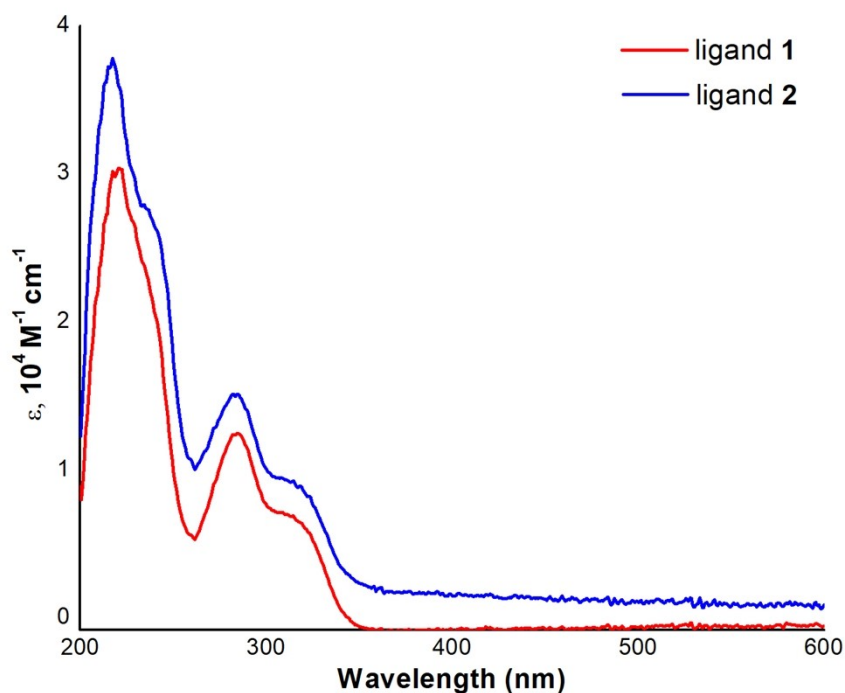

**Figure S8.** Experimental UV-Vis spectra of ligands **1** and **2** recorded in acetonitrile solution. All measurements were recorded under ambient conditions.

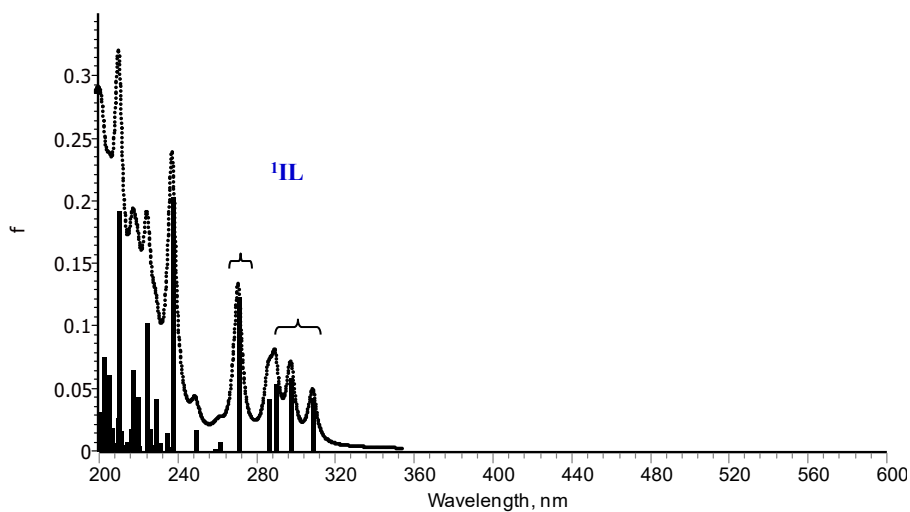

**Figure S9.** The calculated absorption spectrum for **1**. The vertical lines showing the position of singlet-singlet electronic transitions and their intensity ( $f$  – oscillator strength) were broadened by the Lorentz function (f.w.h.m. = 0.25 eV).

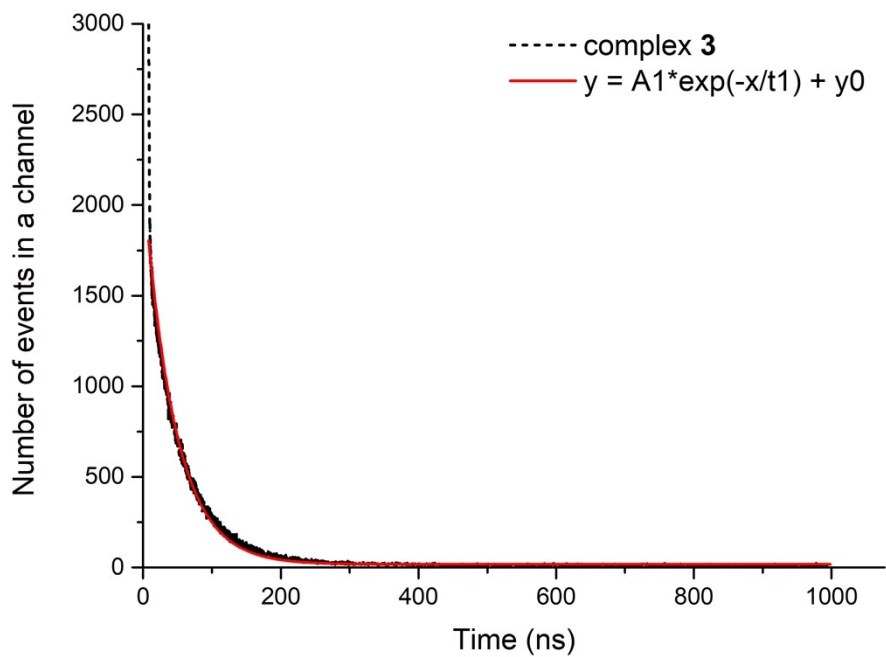

**Figure S10.** Emission decay curve of the HE band and corresponding fit for complex 3.

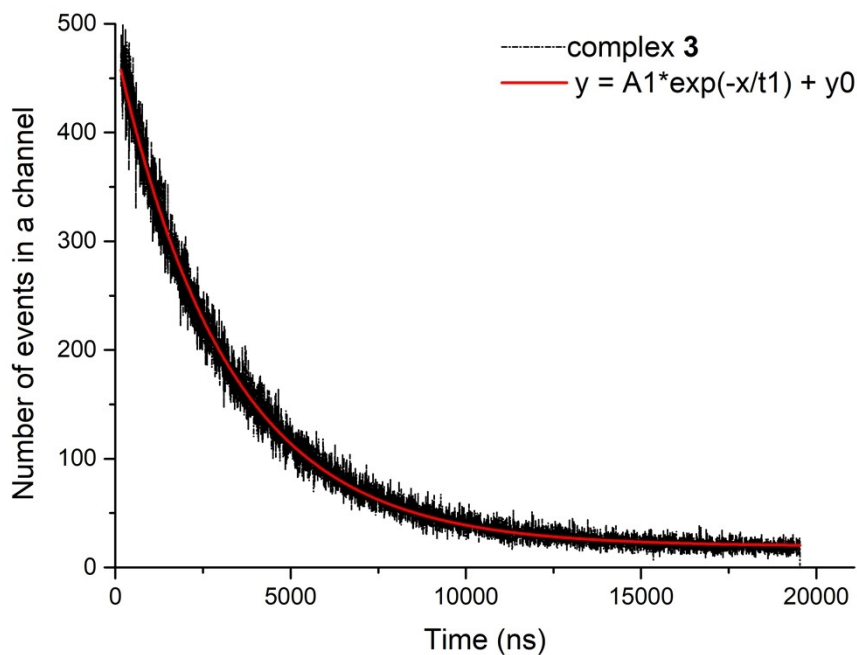

**Figure S11.** Emission decay curve of the LE band and corresponding fit for complex 3.

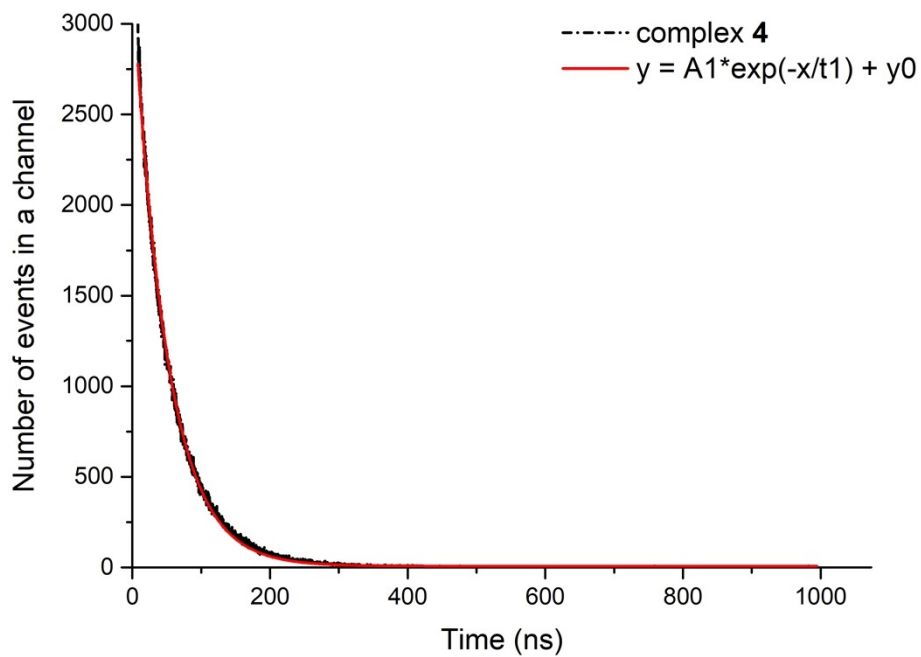

**Figure S12.** Emission decay curve of the HE band and corresponding fit for complex 4.

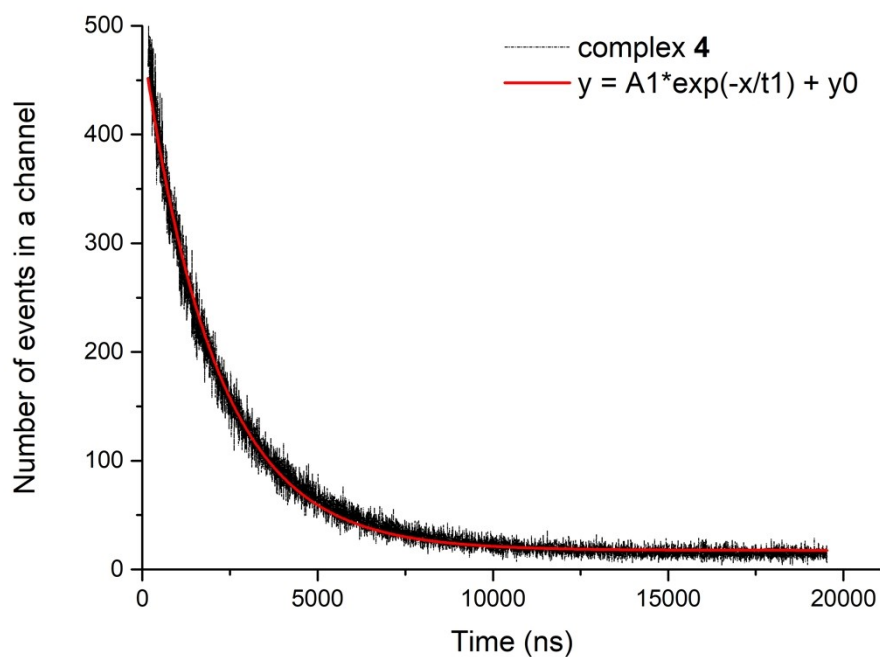

**Figure S13.** Emission decay curve of the LE band and corresponding fit for complex 4.

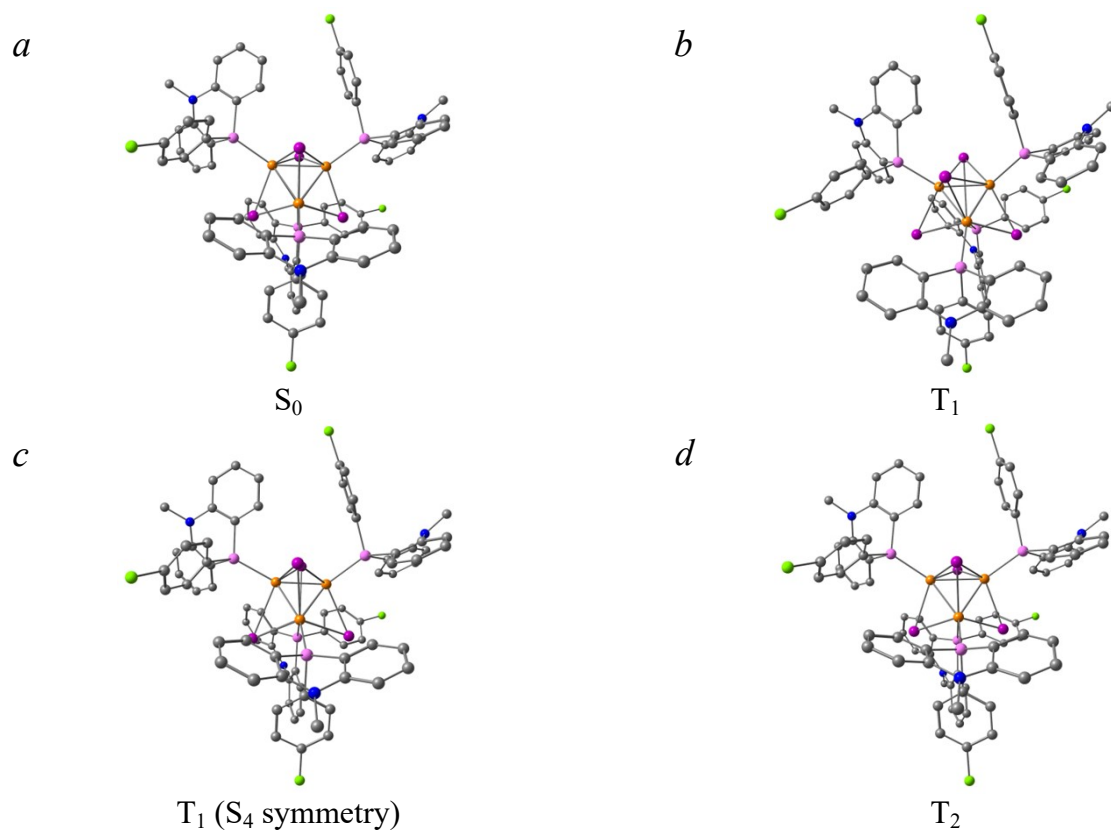

**Figure S14.** The equilibrium structures of the singlet ground state  $S_0$  (*a*), the lowest triplet state  $T_1$  obtained without (*b*) and with (*c*) accounting for the  $S_4$  symmetry found in the solid state, and the second triplet state  $T_2$  (*d*) (complex **3**).
